# Supplementary material
Source: PubMed Central journal article supplement (PMC7641523)
Supplement: mmc1.pdf [file mmc1.pdf]

| Country                                                                    | WHO_region | Cumulative_cases <sup>a</sup> | Cumulative_deaths <sup>a</sup> | Population (million) <sup>b</sup> | Confirmed cases per 1 million population | Deaths per 1 million population | BCG Coverage (%) <sup>c</sup> | Developmental level <sup>d</sup> | Transmission classification <sup>e</sup> | Human Development Index (HDI) <sup>f</sup> |
|----------------------------------------------------------------------------|------------|-------------------------------|--------------------------------|-----------------------------------|------------------------------------------|---------------------------------|-------------------------------|----------------------------------|------------------------------------------|--------------------------------------------|
| Guadeloupe                                                                 | AMRO       | 290                           | 14                             | 0.400127                          | 724.7698856                              | 34.98889103                     | -                             | SIDs                             | Clusters of cases                        | -                                          |
| Guam                                                                       | WPRO       | 410                           | 5                              | 0.168783                          | 2429.154595                              | 29.62383652                     | -                             | SIDs                             | Clusters of                              | -                                          |
| Martinique                                                                 | AMRO       | 336                           | 16                             | 0.375265                          | 895.3672738                              | 42.63653685                     | -                             | SIDs                             | Clusters of                              | -                                          |
| Saint Helena, Ascension and Tristan da Cunha                               | AMRO       | 216                           | 2                              | 0.038718                          | 5578.800558                              | 51.65556072                     | -                             | SIDs                             | Clusters of                              | -                                          |
| Gibraltar                                                                  | EURO       | 197                           | 0                              | 0.033691                          | 5847.258912                              | 0                               | -                             | -                                | Clusters of                              | -                                          |
| Mayotte                                                                    | AFRO       | 3068                          | 39                             | 0.272813                          | 11245.7984                               | 142.9550645                     | -                             | -                                | Clusters of                              | -                                          |
| French Southern and Antarctic territories, including Réunion               | EMRO       | 19121                         | 110                            | -                                 | 3840                                     | 22                              | -                             | -                                | Clusters of                              | -                                          |
| Réunion                                                                    | AFRO       | 690                           | 5                              | 0.895308                          | 770.6845019                              | 5.584670303                     | -                             | -                                | Clusters of                              | -                                          |
| Norway                                                                     | EURO       | 9638                          | 256                            | 5.421242                          | 1777.821392                              | 47.22165142                     | -                             | -                                | Clusters of                              | 0.954                                      |
| Ireland                                                                    | EURO       | 26768                         | 1772                           | 4.937796                          | 5421.042101                              | 358.8645622                     | -                             | -                                | Clusters of                              | 0.942                                      |
| Germany                                                                    | EURO       | 217293                        | 9201                           | 83.783945                         | 2593.492106                              | 109.8181758                     | -                             | -                                | Clusters of                              | 0.939                                      |
| Australia                                                                  | WPRO       | 21397                         | 313                            | 25.499881                         | 839.101955                               | 12.27456709                     | -                             | -                                | Clusters of                              | 0.938                                      |
| Singapore                                                                  | WPRO       | 55292                         | 27                             | 5.850343                          | 9451.069792                              | 4.61511402                      | -                             | SIDs                             | Clusters of                              | 0.935                                      |
| Finland                                                                    | EURO       | 7601                          | 333                            | 5.540718                          | 1371.843866                              | 60.10051405                     | -                             | -                                | Clusters of                              | 0.925                                      |
| Slovenia                                                                   | EURO       | 2255                          | 120                            | 2.078932                          | 1084.691563                              | 57.72194569                     | -                             | -                                | Clusters of                              | 0.902                                      |
| Spain                                                                      | EURO       | 314362                        | 28503                          | 46.754783                         | 6723.63296                               | 609.6274685                     | -                             | -                                | Clusters of                              | 0.893                                      |
| Czechia                                                                    | EURO       | 18494                         | 389                            | 10.708982                         | 1726.961536                              | 36.32464785                     | -                             | -                                | Clusters of                              | 0.891                                      |
| France                                                                     | EURO       | 189972                        | 30214                          | 65.273512                         | 2910.399551                              | 462.8830145                     | -                             | -                                | Clusters of                              | 0.891                                      |
| Italy                                                                      | EURO       | 250825                        | 35209                          | 60.461828                         | 4148.485223                              | 582.3343614                     | -                             | -                                | Clusters of                              | 0.883                                      |
| Cyprus                                                                     | EURO       | 1252                          | 19                             | 1.207361                          | 1036.972372                              | 15.73680117                     | -                             | -                                | Clusters of                              | 0.873                                      |
| Greece                                                                     | EURO       | 5749                          | 213                            | 10.423056                         | 551.5656828                              | 20.43546538                     | -                             | -                                | Clusters of                              | 0.872                                      |
| Slovakia                                                                   | EURO       | 2599                          | 31                             | 5.459643                          | 476.0384516                              | 5.678026933                     | -                             | -                                | Clusters of                              | 0.857                                      |
| Bulgaria                                                                   | EURO       | 13512                         | 459                            | 6.948445                          | 1944.60775                               | 66.05794534                     | -                             | -                                | Clusters of                              | 0.816                                      |
| Montenegro                                                                 | EURO       | 3714                          | 70                             | 0.628062                          | 5913.428929                              | 111.4539647                     | -                             | -                                | Clusters of                              | 0.816                                      |
| Barbados                                                                   | AMRO       | 142                           | 7                              | 0.287371                          | 494.1347596                              | 24.35875575                     | -                             | SIDs                             | Clusters of                              | 0.813                                      |
| Kuwait                                                                     | EMRO       | 72400                         | 482                            | 4.270563                          | 16953.26822                              | 112.8656807                     | -                             | -                                | Clusters of                              | 0.808                                      |
| Bahamas                                                                    | AMRO       | 898                           | 15                             | 0.393248                          | 2283.546261                              | 38.1438685                      | -                             | SIDs                             | Clusters of                              | 0.805                                      |
| Trinidad and Tobago                                                        | AMRO       | 280                           | 8                              | 1.399491                          | 200.0727407                              | 5.716364021                     | -                             | SIDs                             | Clusters of                              | 0.799                                      |
| Sri Lanka                                                                  | SEARO      | 2871                          | 11                             | 21.41325                          | 134.0758642                              | 0.513700629                     | -                             | -                                | Clusters of                              | 0.78                                       |
| British Indian Ocean Territory                                             | AMRO       | 92                            | 3                              | 0.097928                          | 939.4657299                              | 30.63475206                     | -                             | SIDs                             | Clusters of                              | 0.776                                      |
| Grenada                                                                    | AMRO       | 24                            | 0                              | 0.112519                          | 213.2973098                              | 0                               | -                             | SIDs                             | Clusters of                              | 0.763                                      |
| North Macedonia                                                            | EURO       | 11965                         | 528                            | 2.08338                           | 5743.071355                              | 253.4343231                     | -                             | LLDCs                            | Clusters of                              | 0.759                                      |
| Lebanon                                                                    | EMRO       | 6812                          | 80                             | 6.825442                          | 998.036037                               | 11.72085266                     | -                             | -                                | Clusters of                              | 0.73                                       |
| Maldives                                                                   | SEARO      | 5157                          | 19                             | 0.540542                          | 9540.424241                              | 35.1499051                      | -                             | SIDs                             | Clusters of                              | 0.719                                      |
| Puerto Rico                                                                | AMRO       | 22821                         | 279                            | 2.86084                           | 7977.027726                              | 97.5238042                      | -                             | SIDs                             | Community                                | -                                          |
| Sint Maarten                                                               | AMRO       | 192                           | 17                             | 0.042882                          | 4477.403106                              | 396.4367334                     | -                             | SIDs                             | Community                                | -                                          |
| United States Virgin Islands                                               | AMRO       | 547                           | 9                              | 0.104423                          | 5238.309568                              | 86.18790879                     | -                             | SIDs                             | Community                                | -                                          |
| French Guiana                                                              | AMRO       | 8324                          | 49                             | 0.298682                          | 27869.10493                              | 164.0540776                     | -                             | -                                | Community                                | -                                          |
| Guernsey                                                                   | EURO       | 252                           | 13                             | -                                 | 3987                                     | 205                             | -                             | -                                | Community                                | -                                          |
| Jersey                                                                     | EURO       | 345                           | 31                             | 0.08653                           | 3987.056512                              | 358.2572518                     | -                             | -                                | Community                                | -                                          |
| Kosovo                                                                     | EURO       | 10376                         | 331                            | 0.119446                          | 86867.70591                              | 2771.126702                     | -                             | -                                | Community                                | -                                          |
| San Marino                                                                 | EURO       | 717                           | 42                             | 0.033938                          | 21126.76056                              | 1237.550828                     | -                             | -                                | Community                                | -                                          |
| Switzerland                                                                | EURO       | 36619                         | 1711                           | 8.654618                          | 4231.151508                              | 197.6979227                     | -                             | -                                | Community                                | 0.946                                      |
| Iceland                                                                    | EURO       | 1962                          | 10                             | 0.34125                           | 5749.450549                              | 29.3040293                      | -                             | -                                | Community                                | 0.938                                      |
| Netherlands                                                                | EURO       | 59139                         | 6148                           | 17.134873                         | 3451.382453                              | 358.8004416                     | -                             | -                                | Community                                | 0.933                                      |
| Denmark                                                                    | EURO       | 14815                         | 620                            | 5.792203                          | 2557.748753                              | 107.0404473                     | -                             | -                                | Community                                | 0.93                                       |
| Canada                                                                     | AMRO       | 119451                        | 8981                           | 37.742157                         | 3164.92245                               | 237.956723                      | -                             | -                                | Community                                | 0.922                                      |
| United Kingdom                                                             | EURO       | 311645                        | 46526                          | 67.866004                         | 4590.710627                              | 685.3548192                     | -                             | -                                | Community                                | 0.92                                       |
| United States of America                                                   | AMRO       | 4999815                       | 161547                         | 331.002647                        | 15105.06047                              | 488.0534989                     | -                             | -                                | Community                                | 0.92                                       |
| Belgium                                                                    | EURO       | 74527                         | 9879                           | 11.589616                         | 6430.497784                              | 852.4009769                     | -                             | -                                | Community                                | 0.919                                      |
| Austria                                                                    | EURO       | 22122                         | 723                            | 9.0064                            | 2456.253331                              | 80.276248                       | -                             | -                                | Community                                | 0.914                                      |
| Luxembourg                                                                 | EURO       | 7216                          | 121                            | 0.625976                          | 11527.5985                               | 193.2981456                     | -                             | -                                | Community                                | 0.909                                      |
| Israel                                                                     | EURO       | 83300                         | 603                            | 8.655541                          | 9623.892949                              | 69.66635592                     | -                             | -                                | Community                                | 0.906                                      |
| Poland                                                                     | EURO       | 52410                         | 1809                           | 37.846605                         | 1384.800565                              | 47.7982107                      | -                             | -                                | Community                                | 0.872                                      |
| Andorra                                                                    | EURO       | 963                           | 52                             | 0.077265                          | 12463.5993                               | 673.0084773                     | -                             | -                                | Community                                | 0.857                                      |
| Qatar                                                                      | EMRO       | 113262                        | 188                            | 2.88106                           | 39312.61411                              | 65.25376077                     | -                             | -                                | Community                                | 0.848                                      |
| San Marino and Herzegovina                                                 | EURO       | 14325                         | 402                            | 3.280815                          | 4366.293131                              | 122.5305298                     | -                             | -                                | Community                                | 0.769                                      |
| Suriname                                                                   | AMRO       | 2391                          | 29                             | 0.586634                          | 4075.79513                               | 49.43457079                     | -                             | -                                | Community                                | 0.724                                      |
| British Virgin Islands                                                     | AMRO       | 9                             | 1                              | 0.030237                          | 297.6485762                              | 33.07206403                     | -                             | SIDs                             | No cases                                 | -                                          |
| Montserrat                                                                 | AMRO       | 13                            | 1                              | 0.004999                          | 2600.520104                              | 200.040008                      | -                             | SIDs                             | No cases                                 | -                                          |
| Cook Islands (Maldives)                                                    | AMRO       | 13                            | 0                              | 0.003483                          | 3732.414585                              | 0                               | -                             | -                                | No cases                                 | -                                          |
| Greenland                                                                  | EURO       | 14                            | 0                              | 0.056772                          | 246.6004368                              | 0                               | -                             | -                                | No cases                                 | -                                          |
| Isle of Man                                                                | EURO       | 336                           | 24                             | 0.085032                          | 3951.45357                               | 282.2466836                     | -                             | -                                | No cases                                 | -                                          |
| Saint Barthélemy                                                           | AMRO       | 13                            | 0                              | 0.009885                          | 1315.123925                              | 0                               | -                             | -                                | No cases                                 | -                                          |
| Caraïb Islands (Commonwealth of the Netherlands)                           | WPRO       | 49                            | 2                              | 0.057557                          | 851.3299859                              | 34.74816269                     | -                             | SIDs                             | Pending                                  | -                                          |
| Aruba                                                                      | AMRO       | 563                           | 3                              | 0.106766                          | 5273.214319                              | 28.09883296                     | -                             | SIDs                             | Sporadic cases                           | -                                          |
| Bermuda                                                                    | AMRO       | 158                           | 9                              | 0.062273                          | 2537.215165                              | 144.5249145                     | -                             | SIDs                             | Sporadic cases                           | -                                          |
| Cayman Islands                                                             | AMRO       | 203                           | 1                              | 0.06572                           | 3088.861838                              | 15.21606817                     | -                             | SIDs                             | Sporadic cases                           | -                                          |
| French Polynesia                                                           | WPRO       | 69                            | 0                              | 0.280904                          | 245.6355196                              | 0                               | -                             | SIDs                             | Sporadic cases                           | -                                          |
| New Caledonia                                                              | WPRO       | 23                            | 0                              | 0.285491                          | 80.56295995                              | 0                               | -                             | SIDs                             | Sporadic cases                           | -                                          |
| Sint Eustatius and Curaçao                                                 | AMRO       | 13                            | 0                              | 0.026221                          | 495.7858205                              | 0                               | -                             | -                                | Sporadic cases                           | -                                          |
| Curaçao                                                                    | AMRO       | 32                            | 1                              | 0.1641                            | 195.0030469                              | 6.093845216                     | -                             | -                                | Sporadic cases                           | -                                          |
| Faroe Islands                                                              | EURO       | 313                           | 0                              | 0.048865                          | 6405.40264                               | 0                               | -                             | -                                | Sporadic cases                           | -                                          |
| Holy See                                                                   | EURO       | 12                            | 0                              | 0.000809                          | 14833.12732                              | 0                               | -                             | -                                | Sporadic cases                           | -                                          |
| Monaco                                                                     | EURO       | 99                            | 1                              | 0.039244                          | 2522.678626                              | 25.48160228                     | -                             | -                                | Sporadic cases                           | -                                          |
| Saint Martin                                                               | AMRO       | 78                            | 3                              | 0.038659                          | 2017.641429                              | 77.60159342                     | -                             | -                                | Sporadic cases                           | -                                          |
| French West Indies (Martinique, Guadeloupe, and Saint-Pierre and Miquelon) | AMRO       | 4                             | 0                              | 0.005795                          | 690.2502157                              | 0                               | -                             | -                                | Sporadic cases                           | -                                          |
| Liechtenstein                                                              | EURO       | 89                            | 1                              | 0.038137                          | 201.5676984                              | 2.2648056                       | -                             | -                                | Sporadic cases                           | 0.917                                      |
| Malta                                                                      | EURO       | 1012                          | 9                              | 0.441539                          | 2291.983268                              | 20.3832504                      | -                             | -                                | Sporadic cases                           | 0.885                                      |
| Japan                                                                      | WPRO       | 48928                         | 1052                           | 126.476458                        | 386.8546034                              | 8.317753491                     | 99                            | -                                | Clusters of                              | 0.915                                      |
| Bahrain                                                                    | EMRO       | 44397                         | 163                            | 1.701583                          | 26091.58648                              | 95.79315261                     | 99                            | SIDs                             | Clusters of                              | 0.838                                      |
| Uruguay                                                                    | AMRO       | 1353                          | 37                             | 3.473727                          | 389.4952021                              | 10.65138395                     | 99                            | -                                | Clusters of                              | 0.808                                      |
| Malaysia                                                                   | WPRO       | 9094                          | 125                            | 32.365998                         | 280.9738788                              | 3.862077727                     | 99                            | -                                | Clusters of                              | 0.804                                      |
| Cuba                                                                       | AMRO       | 3046                          | 88                             | 11.326616                         | 268.9240988                              | 7.769310799                     | 99                            | SIDs                             | Clusters of                              | 0.778                                      |

|                    |       |         |       |             |             |             |    |       |                |       |
|--------------------|-------|---------|-------|-------------|-------------|-------------|----|-------|----------------|-------|
| Thailand           | SEARO | 3351    | 58    | 69.799978   | 48.00861112 | 0.830945821 | 99 |       | Clusters of    | 0.765 |
| China              | WPRO  | 89383   | 4696  | 1439.323774 | 62.10069035 | 3.262643253 | 99 |       | Clusters of    | 0.758 |
| Uzbekistan         | EURO  | 31545   | 202   | 33.469199   | 942.5083642 | 6.035399891 | 99 | LLDCs | Clusters of    | 0.71  |
| Libya              | EMRO  | 5929    | 125   | 6.871287    | 862.8660104 | 18.19164299 | 99 |       | Clusters of    | 0.708 |
| Morocco            | EMRO  | 34063   | 516   | 36.910558   | 922.8524803 | 13.97973989 | 99 |       | Clusters of    | 0.676 |
| Guyana             | AMRO  | 568     | 22    | 0.786559    | 722.1327326 | 27.96992978 | 99 | SIDs  | Clusters of    | 0.67  |
| Hungary            | EURO  | 4731    | 605   | 9.66035     | 489.7338088 | 62.62713049 | 99 |       | Community      | 0.845 |
| Oman               | EMRO  | 81787   | 521   | 5.106622    | 16015.87116 | 102.0243911 | 99 |       | Community      | 0.834 |
| (Islamic Republi   | EMRO  | 328844  | 18616 | 83.992953   | 3915.137976 | 221.6376414 | 99 |       | Community      | 0.797 |
| Panama             | AMRO  | 74492   | 1639  | 4.314768    | 17264.42766 | 379.8581986 | 99 |       | Community      | 0.795 |
| Armenia            | EURO  | 40593   | 803   | 2.963234    | 13698.88439 | 270.9877114 | 99 | LLDCs | Community      | 0.76  |
| Algeria            | AFRO  | 35712   | 1312  | 43.851      | 814.3941985 | 29.91950013 | 99 |       | Community      | 0.759 |
| ominican Republ    | AMRO  | 80499   | 1328  | 10.847904   | 7420.696201 | 122.4199624 | 99 | SIDs  | Community      | 0.745 |
| Nicaragua          | AMRO  | 3266    | 123   | 6.624554    | 493.0143222 | 18.5672877  | 99 |       | Community      | 0.651 |
| Bangladesh         | SEARO | 260507  | 3438  | 164.689383  | 1581.8081   | 20.87566264 | 99 | LDCs  | Community      | 0.614 |
| Republic of Tar    | AFRO  | 509     | 21    | 59.734213   | 8.521079871 | 0.351557323 | 99 | LDCs  | Community      | 0.528 |
| Mauritania         | AFRO  | 6550    | 157   | 4.64966     | 1408.705153 | 33.76590977 | 99 | LDCs  | Community      | 0.527 |
| Senegal            | AFRO  | 11312   | 236   | 16.74393    | 675.5881086 | 14.09465998 | 99 | LDCs  | Community      | 0.514 |
| irunei Darussala   | WPRO  | 142     | 3     | 0.437483    | 324.584041  | 6.857409316 | 99 |       | No cases       | 0.845 |
| aint Kitts and Ne  | AMRO  | 17      | 0     | 0.053192    | 319.5969319 | 0           | 99 | SIDs  | No cases       | 0.777 |
| Tajikistan         | EURO  | 7827    | 62    | 9.537642    | 820.6430898 | 6.500558524 | 99 | LLDCs | Pending        | 0.656 |
| Mauritius          | AFRO  | 344     | 10    | 1.271767    | 270.4897988 | 7.863075548 | 99 | SIDs  | Sporadic cases | 0.796 |
| Mongolia           | WPRO  | 293     | 0     | 3.278292    | 89.37580911 | 0           | 99 | LLDCs | Sporadic cases | 0.735 |
| Republic of Kore:  | WPRO  | 14660   | 305   | 51.269183   | 285.9417518 | 5.94899279  | 98 |       | Clusters of    | 0.906 |
| Croatia            | EURO  | 5649    | 158   | 4.105268    | 1376.036839 | 38.48713409 | 98 |       | Clusters of    | 0.837 |
| Dominica           | AMRO  | 18      | 0     | 0.071991    | 250.0312539 | 0           | 98 | SIDs  | Clusters of    | 0.724 |
| Namibia            | AFRO  | 3101    | 19    | 2.540916    | 1220.42602  | 7.477618308 | 98 |       | Clusters of    | 0.645 |
| Rwanda             | AFRO  | 2152    | 7     | 12.952209   | 166.1492646 | 0.540448351 | 98 | LDCs  | Clusters of    | 0.536 |
| Chile              | AMRO  | 375044  | 10139 | 19.116209   | 19619.16194 | 530.3875889 | 98 |       | Community      | 0.847 |
| Serbia             | EURO  | 28262   | 646   | 8.73737     | 3234.611788 | 73.93529174 | 98 |       | Community      | 0.799 |
| Iraq               | EMRO  | 153599  | 5464  | 40.222503   | 3818.733011 | 135.8443556 | 98 |       | Community      | 0.689 |
| Eswatini           | AFRO  | 3309    | 61    | 1.160164    | 2852.182967 | 52.57877335 | 98 | LLDCs | Community      | 0.608 |
| Burkina Faso       | AFRO  | 1204    | 54    | 20.903278   | 57.59862161 | 2.583326883 | 98 | LDCs  | Community      | 0.434 |
| Seychelles         | AFRO  | 126     | 0     | 0.09834     | 1281.269067 | 0           | 98 | SIDs  | Sporadic cases | 0.801 |
| Botswana           | AFRO  | 804     | 2     | 2.351625    | 341.8912454 | 0.850475735 | 97 | LLDCs | Clusters of    | 0.728 |
| Jamaica            | AMRO  | 1023    | 14    | 2.961161    | 345.4726035 | 4.727875316 | 97 | SIDs  | Clusters of    | 0.726 |
| Cabo Verde         | AFRO  | 2883    | 32    | 0.555988    | 5185.363713 | 57.55519903 | 97 | SIDs  | Clusters of    | 0.651 |
| Lithuania          | EURO  | 2265    | 81    | 2.722291    | 239.6997626 | 8.572044489 | 97 |       | Community      | 0.869 |
| Belarus            | EURO  | 68947   | 589   | 9.449321    | 7296.503103 | 62.33252104 | 97 |       | Community      | 0.817 |
| Fiji               | WPRO  | 27      | 1     | 0.896444    | 30.11900353 | 1.115518649 | 97 | SIDs  | Sporadic cases | 0.724 |
| Eritrea            | AFRO  | 285     | 0     | 3.546427    | 80.36257337 | 0           | 97 | LDCs  | Sporadic cases | 0.434 |
| Latvia             | EURO  | 1293    | 32    | 1.886202    | 685.5045218 | 16.96530912 | 96 |       | Clusters of    | 0.854 |
| ussian Federat     | EURO  | 897599  | 15131 | 145.93446   | 6150.69943  | 103.6835303 | 96 |       | Clusters of    | 0.824 |
| Georgia            | EURO  | 1264    | 17    | 3.989175    | 316.8574956 | 4.261532773 | 96 |       | Clusters of    | 0.786 |
| Azerbaijan         | EURO  | 33647   | 492   | 10.139175   | 3318.514573 | 48.52465807 | 96 | LLDCs | Clusters of    | 0.754 |
| Egypt              | EMRO  | 95666   | 5035  | 102.334403  | 934.8371339 | 49.20144011 | 96 |       | Clusters of    | 0.7   |
| Viet Nam           | WPRO  | 847     | 15    | 97.338583   | 8.701585475 | 0.154101278 | 96 |       | Clusters of    | 0.693 |
| Kyrgyzstan         | EURO  | 40455   | 1478  | 6.524191    | 6200.7688   | 226.5414976 | 96 | LLDCs | Clusters of    | 0.674 |
| Nepal              | SEARO | 23310   | 79    | 29.136808   | 800.019     | 2.711347104 | 96 | LDCs  | Clusters of    | 0.579 |
| Romania            | EURO  | 62547   | 2729  | 19.237682   | 3251.275284 | 141.8570075 | 96 |       | Community      | 0.816 |
| Turkey             | EURO  | 241997  | 5858  | 84.339067   | 2869.334564 | 69.45772829 | 96 |       | Community      | 0.806 |
| Ghana              | AFRO  | 41212   | 215   | 31.072945   | 1326.298489 | 6.919202541 | 96 |       | Community      | 0.596 |
| ome and Princ      | AFRO  | 878     | 15    | 0.219161    | 4006.187232 | 68.44283426 | 95 | LDCs  | Clusters of    | 0.609 |
| Zimbabwe           | AFRO  | 4748    | 104   | 14.862927   | 319.4525547 | 6.997275839 | 95 | LLDCs | Clusters of    | 0.563 |
| Afghanistan        | EMRO  | 37269   | 1344  | 38.928      | 957.3828607 | 34.52527744 | 95 | LDCs  | Clusters of    | 0.496 |
| Djibouti           | EMRO  | 5347    | 59    | 0.988002    | 5411.932365 | 59.71647831 | 95 | LDCs  | Clusters of    | 0.495 |
| Zambia             | AFRO  | 8210    | 241   | 18.383956   | 446.5850549 | 13.10925679 | 95 | LDCs  | Community      | 0.591 |
| Timor-Leste        | SEARO | 25      | 0     | 1.318442    | 18.96177458 | 0           | 95 | LDCs  | No cases       | 0.626 |
| Saint Lucia        | AMRO  | 25      | 0     | 0.183629    | 136.1440731 | 0           | 95 | SIDs  | Sporadic cases | 0.745 |
| Belize             | AMRO  | 154     | 2     | 0.397621    | 387.3034875 | 5.029915422 | 95 | SIDs  | Sporadic cases | 0.72  |
| Cambodia           | WPRO  | 266     | 0     | 16.718971   | 15.91007006 | 0           | 95 | LDCs  | Sporadic cases | 0.581 |
| Uganda             | AFRO  | 1297    | 9     | 45.741      | 28.35530487 | 0.196760018 | 94 | LDCs  | Clusters of    | 0.528 |
| Lesotho            | AFRO  | 781     | 24    | 2.142252    | 364.5696211 | 11.20316377 | 94 | LDCs  | Clusters of    | 0.518 |
| ited Arab Emiral   | EMRO  | 62704   | 357   | 9.8904      | 6339.885141 | 36.09560786 | 94 |       | Community      | 0.866 |
| Peru               | AMRO  | 478024  | 21072 | 32.971846   | 14497.9447  | 639.0906957 | 94 |       | Community      | 0.759 |
| epublic of Moldo   | EURO  | 27841   | 850   | 4.033963    | 6901.649817 | 210.7109064 | 94 | LLDCs | Community      | 0.711 |
| Comoros            | AFRO  | 399     | 7     | 0.869595    | 458.8342849 | 8.049724297 | 94 | LDCs  | Community      | 0.538 |
| Madagascar         | AFRO  | 13202   | 151   | 27.691019   | 476.7610755 | 5.453031541 | 94 | LDCs  | Community      | 0.521 |
| Burundi            | AFRO  | 408     | 1     | 11.890781   | 34.31229622 | 0.084098765 | 93 | LDCs  | Clusters of    | 0.423 |
| Estonia            | EURO  | 2158    | 63    | 1.326539    | 1626.789714 | 47.4920074  | 92 |       | Clusters of    | 0.882 |
| India              | SEARO | 2268675 | 45257 | 1380.004385 | 1643.962168 | 32.79482333 | 92 |       | Clusters of    | 0.647 |
| Angola             | AFRO  | 1679    | 78    | 32.866268   | 51.08581236 | 2.373253939 | 92 | LDCs  | Clusters of    | 0.574 |
| Sudan              | EMRO  | 11956   | 781   | 43.849269   | 272.6613299 | 17.81101528 | 92 | LDCs  | Community      | 0.507 |
| Bhutan             | SEARO | 113     | 0     | 0.771612    | 146.4466597 | 0           | 92 | LDCs  | Sporadic cases | 0.617 |
| Myanmar            | SEARO | 360     | 6     | 54.409794   | 6.616455854 | 0.110274264 | 91 | LDCs  | Clusters of    | 0.584 |
| Côte d'Ivoire      | AFRO  | 16798   | 105   | 26.378275   | 636.8119219 | 3.980548387 | 91 |       | Community      | -     |
| la (Bolivarian Re  | AMRO  | 25805   | 223   | 28.435943   | 907.4782574 | 7.842187614 | 91 |       | Community      | 0.726 |
| Malawi             | AFRO  | 4674    | 146   | 19.129955   | 244.3288549 | 7.632009589 | 91 | LDCs  | Community      | 0.485 |
| Tunisia            | EMRO  | 1717    | 51    | 11.818618   | 145.2792535 | 4.31522535  | 91 |       | Sporadic cases | 0.739 |
| Colombia           | AMRO  | 387481  | 12842 | 50.882884   | 7615.154047 | 252.383493  | 90 |       | Community      | 0.761 |
| Indonesia          | SEARO | 127083  | 5765  | 273.523621  | 464.6143523 | 21.07679029 | 90 |       | Community      | 0.707 |
| Ethiopia           | AFRO  | 23591   | 420   | 114.963583  | 205.2041123 | 3.653330812 | 90 | LDCs  | Community      | 0.47  |
| Mozambique         | AFRO  | 2411    | 16    | 31.255435   | 77.13858406 | 0.511910968 | 90 | LDCs  | Community      | 0.446 |
| Benin              | AFRO  | 2001    | 65    | 12.123198   | 165.0554581 | 5.361621579 | 89 | LDCs  | Community      | 0.52  |
| Pakistan           | EMRO  | 285191  | 6112  | 220.892331  | 1291.086018 | 27.6658895  | 88 |       | Clusters of    | 0.56  |
| Costa Rica         | AMRO  | 23285   | 235   | 5.094114    | 4571.158007 | 46.13167275 | 88 |       | Community      | 0.794 |
| Congo              | AFRO  | 3746    | 60    | 5.518092    | 678.676615  | 10.87332361 | 88 |       | Community      | 0.608 |
| Gambia             | AFRO  | 1235    | 23    | 2.416664    | 511.0350467 | 9.517251881 | 88 | LDCs  | Sporadic cases | 0.466 |
| Kazakhstan         | EURO  | 113501  | 1433  | 18.776707   | 6044.776648 | 76.3179614  | 87 | LLDCs | Clusters of    | 0.817 |
| Honduras           | AMRO  | 47454   | 1495  | 9.904608    | 4791.103293 | 150.9398454 | 87 |       | Community      | 0.623 |
| itic Republic of t | AFRO  | 9488    | 224   | 89.561404   | 105.9384911 | 2.501077361 | 87 | LDCs  | Community      | 0.459 |
| icent and the Gr   | AMRO  | 57      | 0     | 0.110947    | 513.7588218 | 0           | 87 | SIDs  | Sporadic cases | 0.728 |
| Jordan             | EMRO  | 1268    | 11    | 10.20314    | 124.2754681 | 1.078099487 | 86 |       | Clusters of    | 0.723 |
| Ecuador            | AMRO  | 94701   | 5932  | 17.64306    | 5367.6063   | 336.2228548 | 86 |       | Community      | 0.758 |
| Guatemala          | AMRO  | 56987   | 2222  | 17.915567   | 3180.864999 | 124.026217  | 86 |       | Community      | 0.651 |
| rian Arab Reput    | EMRO  | 1255    | 52    | 17.500657   | 71.71159346 | 2.97131702  | 86 |       | Community      | 0.549 |

|                                    |      |         |        |            |             |             |    |       |                |       |
|------------------------------------|------|---------|--------|------------|-------------|-------------|----|-------|----------------|-------|
| Sierra Leone                       | AFRO | 1917    | 69     | 7.976985   | 240.3163601 | 8.649884637 | 86 | LDCs  | Community      | 0.438 |
| Sierra Leone's Democratic Republic | WPRO | 20      | 0      | 7.275556   | 2.748930803 | 0           | 86 | LDCs  | Sporadic cases | 0.604 |
| Brazil                             | AMRO | 3035422 | 101049 | 212.559409 | 14280.34644 | 475.3917998 | 85 |       | Community      | 0.761 |
| Ukraine                            | EURO | 83115   | 1951   | 43.733759  | 1900.476929 | 44.61084628 | 84 |       | Community      | 0.75  |
| South Africa                       | AFRO | 563598  | 10621  | 59.30869   | 9502.789557 | 179.0799965 | 84 |       | Community      | 0.705 |
| Kenya                              | AFRO | 26928   | 423    | 53.7713    | 500.7875949 | 7.866650053 | 84 |       | Community      | 0.579 |
| Cameroon                           | AFRO | 18213   | 398    | 26.545864  | 686.0955816 | 14.99291942 | 84 |       | Community      | 0.563 |
| Togo                               | AFRO | 1060    | 23     | 8.278737   | 128.0388542 | 2.778201554 | 84 | LDCs  | Community      | 0.513 |
| Liberia                            | AFRO | 1240    | 79     | 5.057677   | 245.1718447 | 15.61981914 | 84 | LDCs  | Community      | 0.465 |
| Guinea-Bissau                      | AFRO | 2052    | 29     | 1.967998   | 1042.683986 | 14.73578733 | 84 | LDCs  | Community      | 0.461 |
| Mali                               | AFRO | 2573    | 125    | 20.250834  | 127.0564955 | 6.172585287 | 83 | LDCs  | Community      | 0.427 |
| Guinea (Plurinational State of)    | AMRO | 89999   | 3640   | 11.673029  | 7709.995409 | 311.8299458 | 80 | LLDCs | Community      | 0.703 |
| Guinea                             | AFRO | 7952    | 50     | 13.132792  | 605.5071915 | 3.807263528 | 80 | LDCs  | Community      | 0.466 |
| Argentina                          | AMRO | 246499  | 4634   | 45.195777  | 5454.027265 | 102.5317033 | 78 |       | Community      | 0.83  |
| El Salvador                        | AMRO | 20872   | 563    | 6.486201   | 3217.908295 | 86.7996536  | 78 |       | Community      | 0.667 |
| Mexico                             | AMRO | 480278  | 52298  | 128.932753 | 3725.027108 | 405.6223014 | 76 |       | Community      | 0.767 |
| Chad                               | AFRO | 945     | 76     | 16.425859  | 57.53123779 | 4.62685087  | 76 | LDCs  | Community      | 0.401 |
| Somalia                            | EMRO | 3227    | 93     | 15.893219  | 203.042568  | 5.851552162 | 76 | LDCs  | Sporadic cases | -     |
| Paraguay                           | AMRO | 6907    | 75     | 7.13253    | 968.3800839 | 10.51520288 | 75 | LLDCs | Community      | 0.724 |
| Gabon                              | AFRO | 8006    | 51     | 2.225728   | 3597.025333 | 22.91385111 | 74 |       | Community      | 0.702 |
| Niger                              | AFRO | 1158    | 69     | 24.206636  | 47.83812174 | 2.850458031 | 70 | LDCs  | Community      | 0.377 |
| Philippines                        | WPRO | 136638  | 2293   | 109.581085 | 1246.912275 | 20.92514415 | 69 |       | Community      | 0.712 |
| Yemen                              | EMRO | 1830    | 519    | 29.825968  | 61.35592984 | 17.40094404 | 69 | LDCs  | Community      | 0.463 |
| Nigeria                            | AFRO | 46867   | 950    | 206.139587 | 227.355651  | 4.608527716 | 67 |       | Community      | 0.534 |
| Haiti                              | AMRO | 7634    | 183    | 11.402533  | 669.5003645 | 16.04906559 | 66 | LDCs  | Community      | 0.503 |
| Equatorial Guinea                  | AFRO | 4821    | 83     | 1.402985   | 3436.244864 | 59.15957761 | 63 |       | Community      | 0.588 |
| South Sudan                        | AFRO | 2472    | 47     | 11.193729  | 220.8379352 | 4.198779513 | 60 | LDCs  | Community      | 0.413 |
| Central African Republic           | AFRO | 4641    | 60     | 4.829764   | 960.9165168 | 12.42296725 | 60 | LDCs  | Community      | 0.381 |
| Saudi Arabia                       | EMRO | 289947  | 3199   | 34.813867  | 8328.491632 | 91.88867183 | 52 |       | Clusters of    | 0.857 |
| Guinea-Bissau                      | WPRO | 214     | 3      | 8.947027   | 23.91855976 | 0.335306913 | 45 | SIDs  | Community      | 0.543 |
| Portugal                           | EURO | 52825   | 1759   | 10.196707  | 5180.594088 | 172.506673  | 29 |       | Clusters of    | 0.85  |
| Sweden                             | EURO | 82972   | 5766   | 10.09927   | 8215.643309 | 570.9323545 | 25 |       | Community      | 0.937 |
| New Zealand                        | WPRO | 1220    | 22     | 4.822233   | 252.9948263 | 4.562201785 | 10 |       | Clusters of    | 0.921 |

a Data was obtained from the WHO Health Emergency Dashboard WHO (COVID-19) Homepage (<https://covid19.who.int/>), data last updated: 2020/8/1

b United Nations. Department of Economic and Social Affairs, Population Division (2019). World Population Prospects 2019, Online Edition. Rev. 1.

c Data was obtained from WHO database.

d United Nations Office of the High Representative for the Least Developed Countries, Landlocked Developing Countries and Small Island Developing States (UN-OHRLS). Economic impact of broadband in LDCs, LLDCs and SIDs (2019). Jul 15 2020. Available at <https://www.un.org/ohrls/news/economic-impact-broadband-ldcs-lldcs-and-sids-2019>.

e WHO. Coronavirus disease (COVID-19) Situation Report-205. August 12 2020. Available at <https://www.who.int/emergencies/diseases/novel-coronavirus-2019/situation-reports/20200812-sitrep-205-covid-19>

f United Nations Development Programme. Human Development Report 2019. UN Plaza, New York, NY 10017 USA. Available at <http://report.hdr.undp.org/>
